# Supplementary material for: 21-O-Angeloyltheasapogenol E3, a Novel Triterpenoid Saponin from the Seeds of Tea Plants, Inhibits Macrophage-Mediated Inflammatory Responses in a NF-κB-Dependent Manner
Source: Hindawi journal article supplement (doi:10.1155/2014/658351), 2014-01-01

# Supplementary Figure 1

## NMR profile

terpenoid 21-22  
Pulse Sequence: s2pu1  
Solvent: CDC13  
Ambient temperature  
GEMINI-300BB "PACIFIC-nmr300"

동차씨 사본  
21-22 fraction.

Thewaponin E1 → 분자량

Relax. delay 3.000 sec  
Pulse 67.5 degrees  
Acq. time 2.000 sec  
Width 4000.0 Hz  
16 repetitions  
OBSERVE H1, 300.0888518 MHz  
DATA PROCESSING  
Line broadening 1.0 Hz  
FT size 32768  
Total time 1 min, 25 sec

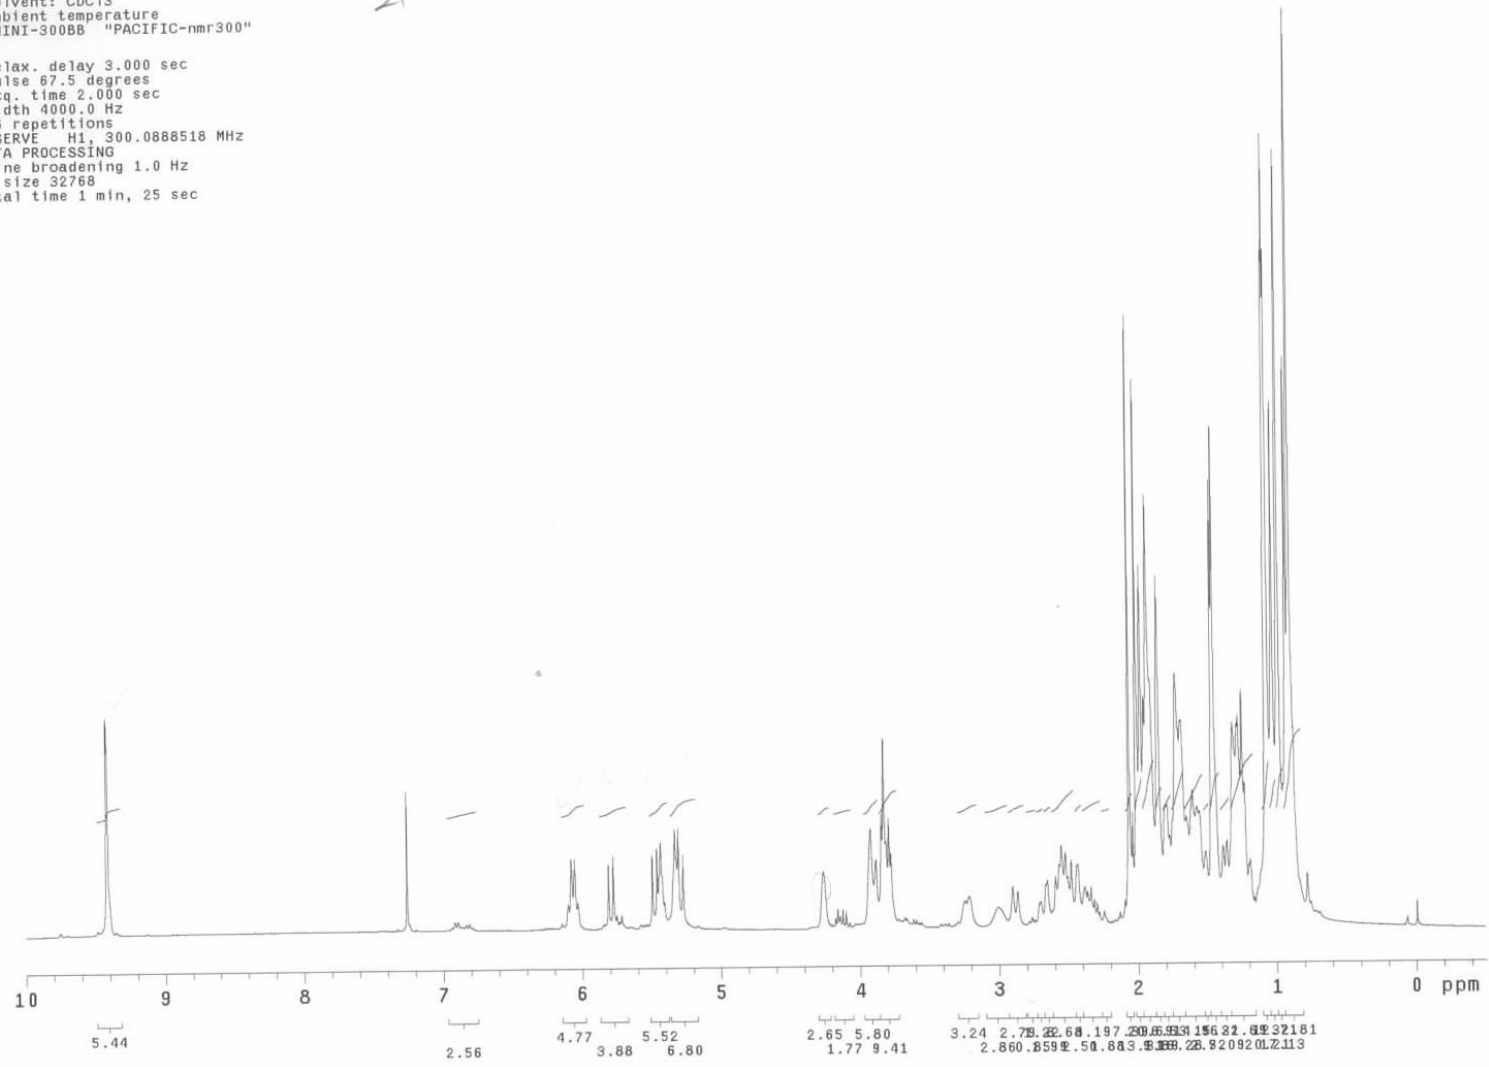

# Supplementary Figure 2

## MS spectrum

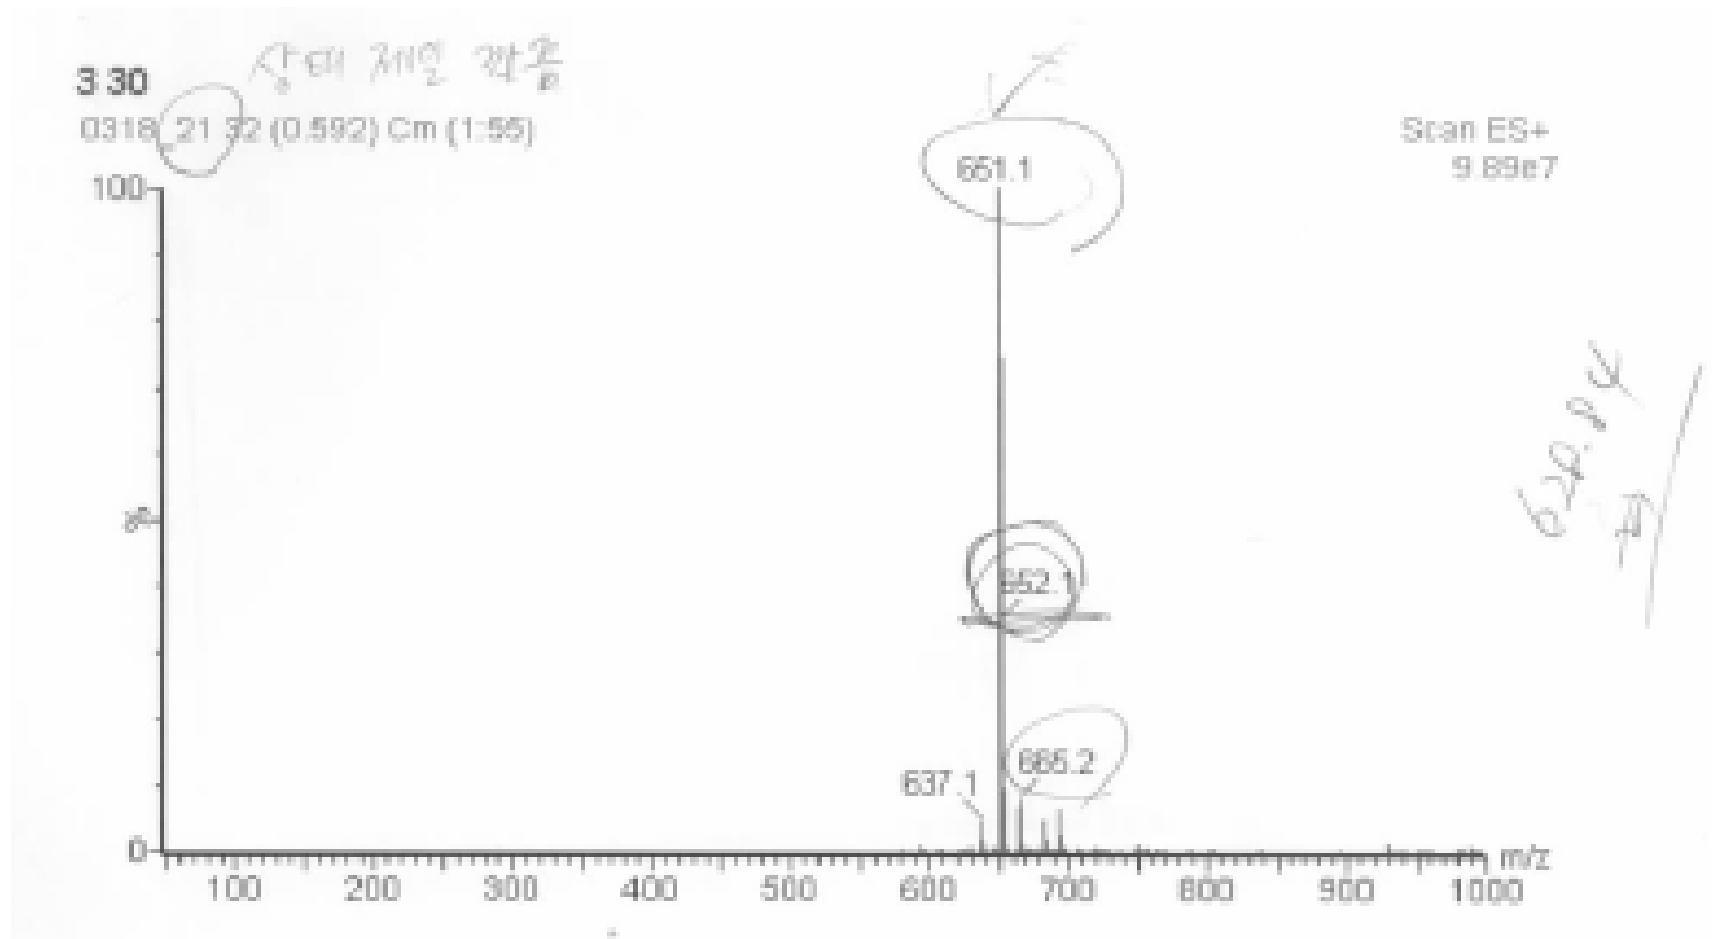

Supplement: f1 [file 658351.f1.pdf]
